# Supplementary material for: Evaluation of Metabolite Profiles of Ginseng Berry Pomace Obtained after Different Pressure Treatments and Their Correlation with the Antioxidant Activity
Source: PubMed Central journal article supplement (PMC7827211; doi:10.3390/molecules26020284), 2021-01-08
Supplement: molecules-26-00284-s001.pdf [file molecules-26-00284-s001.pdf]

## Supplementary Information

**Table S1.** The yield of fractions obtained using various solvents for GBP

| <b>Fraction</b> | <b>Yield (%)</b> |
|-----------------|------------------|
| Hexane          | 15.58            |
| Chloroform      | 5.74             |
| Ethyl acetate   | 4.70             |
| Butanol         | 50.00            |
| Water           | 46.14            |

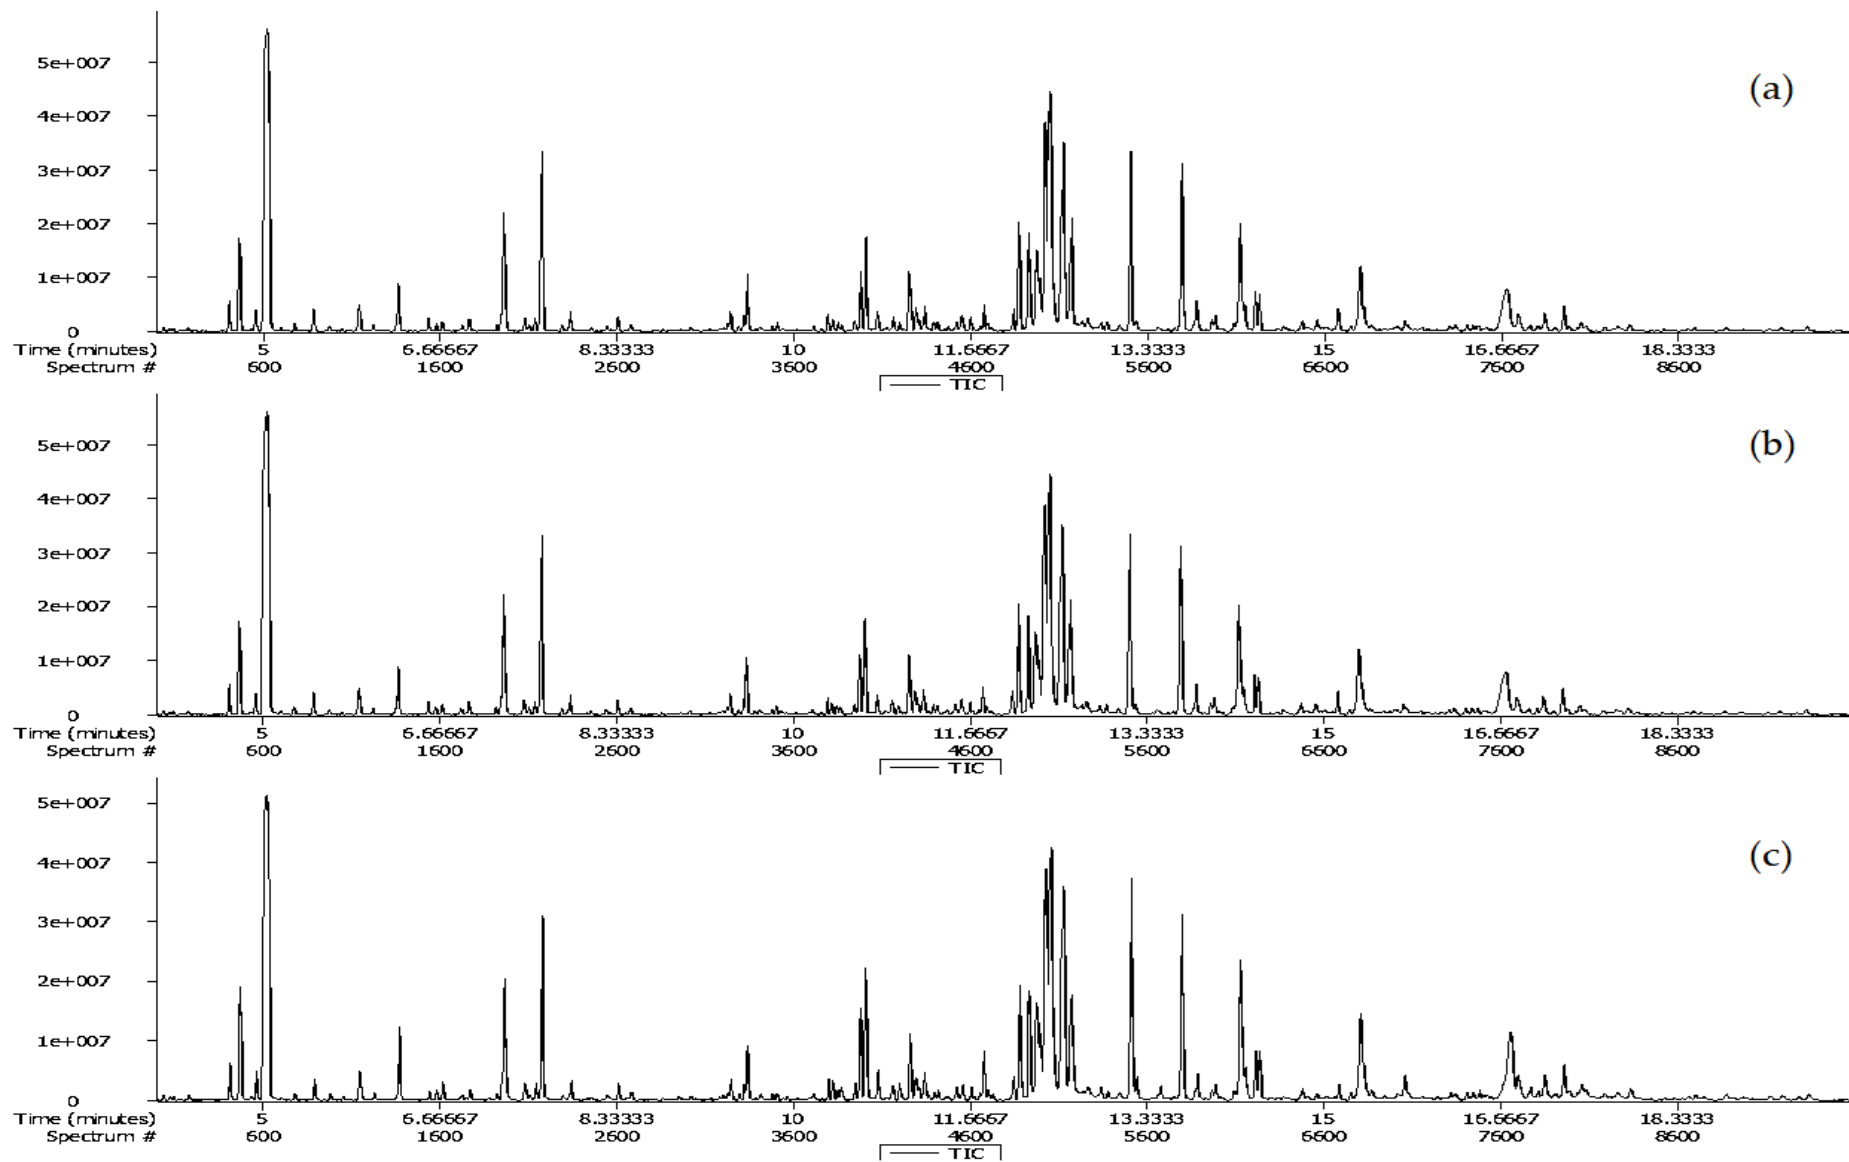

Figure S1. The GC-TOF-MS chromatogram of GBP obtained after different UHP processing treatments (a) CON, control; (b) U500, 500MPa; (c) U600, 600MPa is shown.

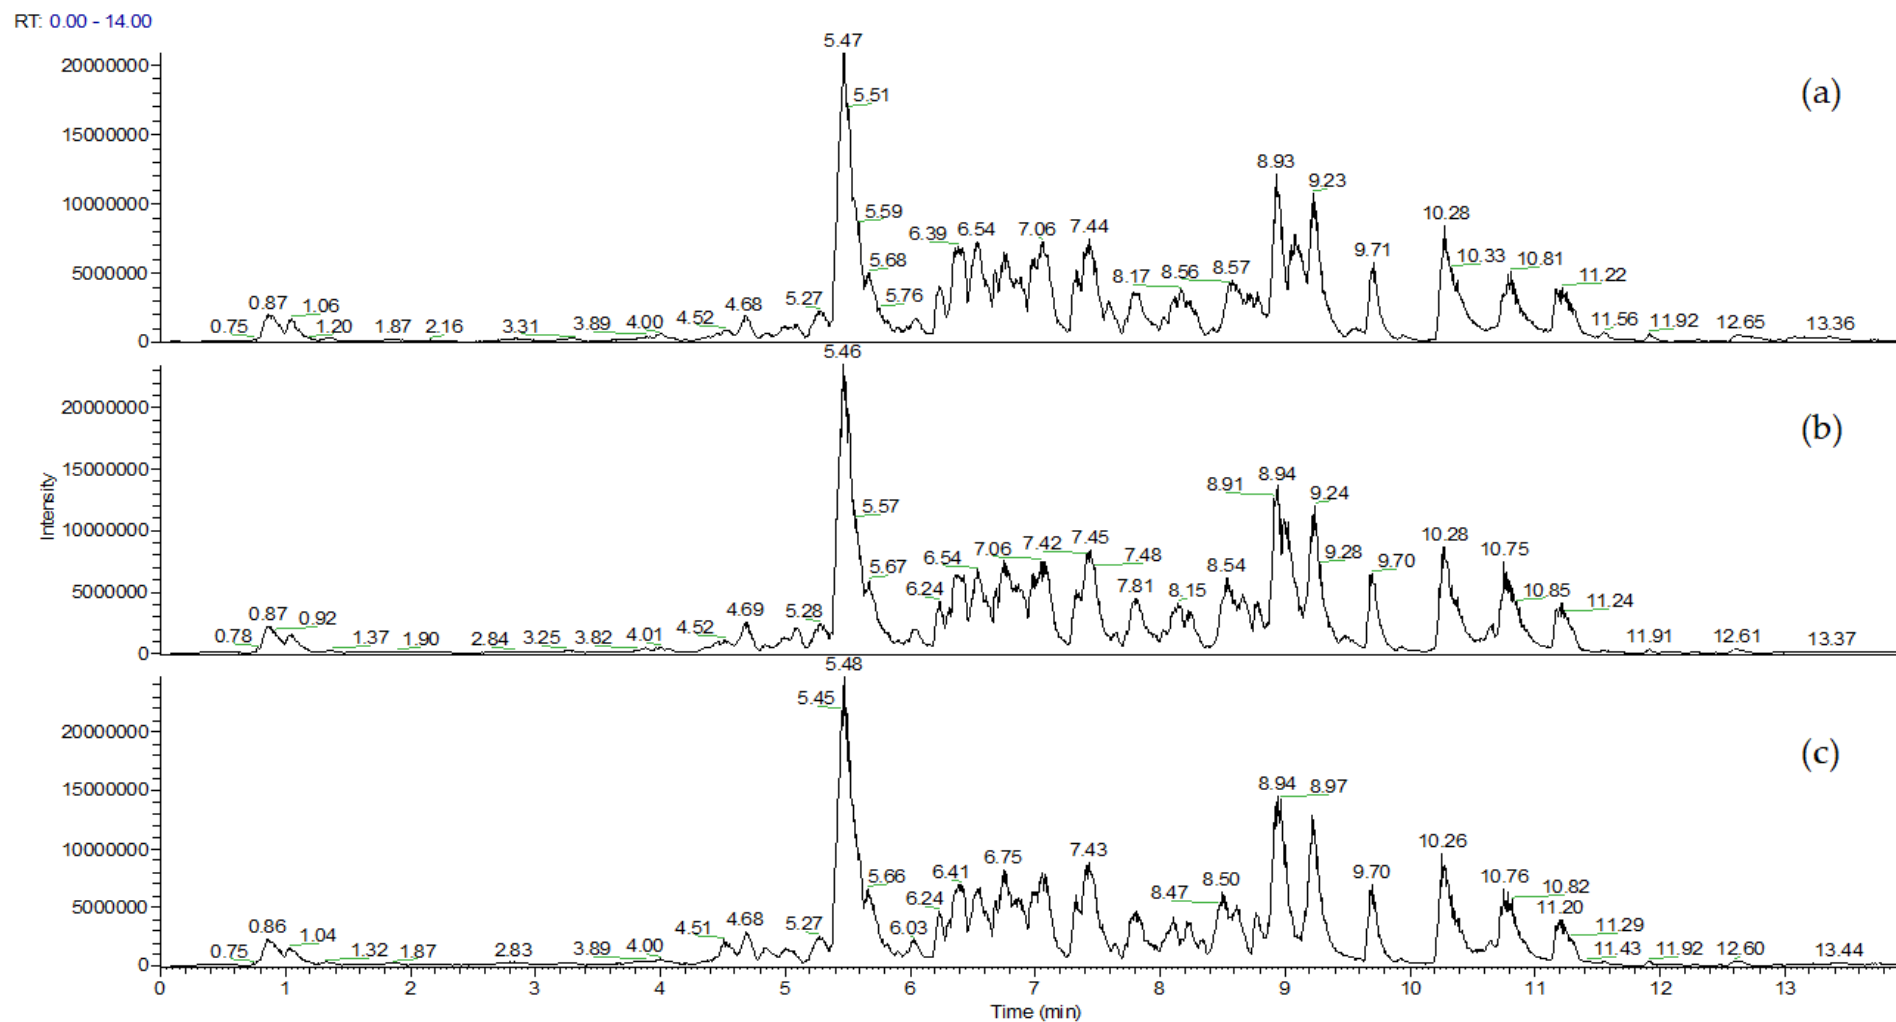

**Figure S2.** The UHPLC-LTQ-Orbitrap-MS/MS chromatogram of GBP obtained after different UHP processing treatments (a) CON, control; (b) U500, 500MPa; (c) U600, 600MPa is shown.

**Table S2.** MetAlign settings used to automatically process the experimental dataset.

| <b>Parameter</b>                          | <b>Value</b>     |                                 |
|-------------------------------------------|------------------|---------------------------------|
|                                           | <b>GC-TOF-MS</b> | <b>UHPLC-LTQ-Orbitrap-MS/MS</b> |
| Retention begin (scan nr.)                | 1                | 1                               |
| Retention end (scan nr.)                  | 9,600            | 9,600                           |
| Maximum amplitude                         | 10,000,000       | 10,000,000                      |
| Peak slope factor (x Noise)               | 1                | 1                               |
| Peak threshold factor (x Noise)           | 2                | 2                               |
| Peak threshold (Abs. Value)               | 30               | 20                              |
| Average peak width at half height (Scans) | 80               | 30                              |
| Scaling Options                           | None             | None                            |
| Maximum shift per scan                    | 50               | 30                              |
| Select min nr per peak set                | 9                | 9                               |

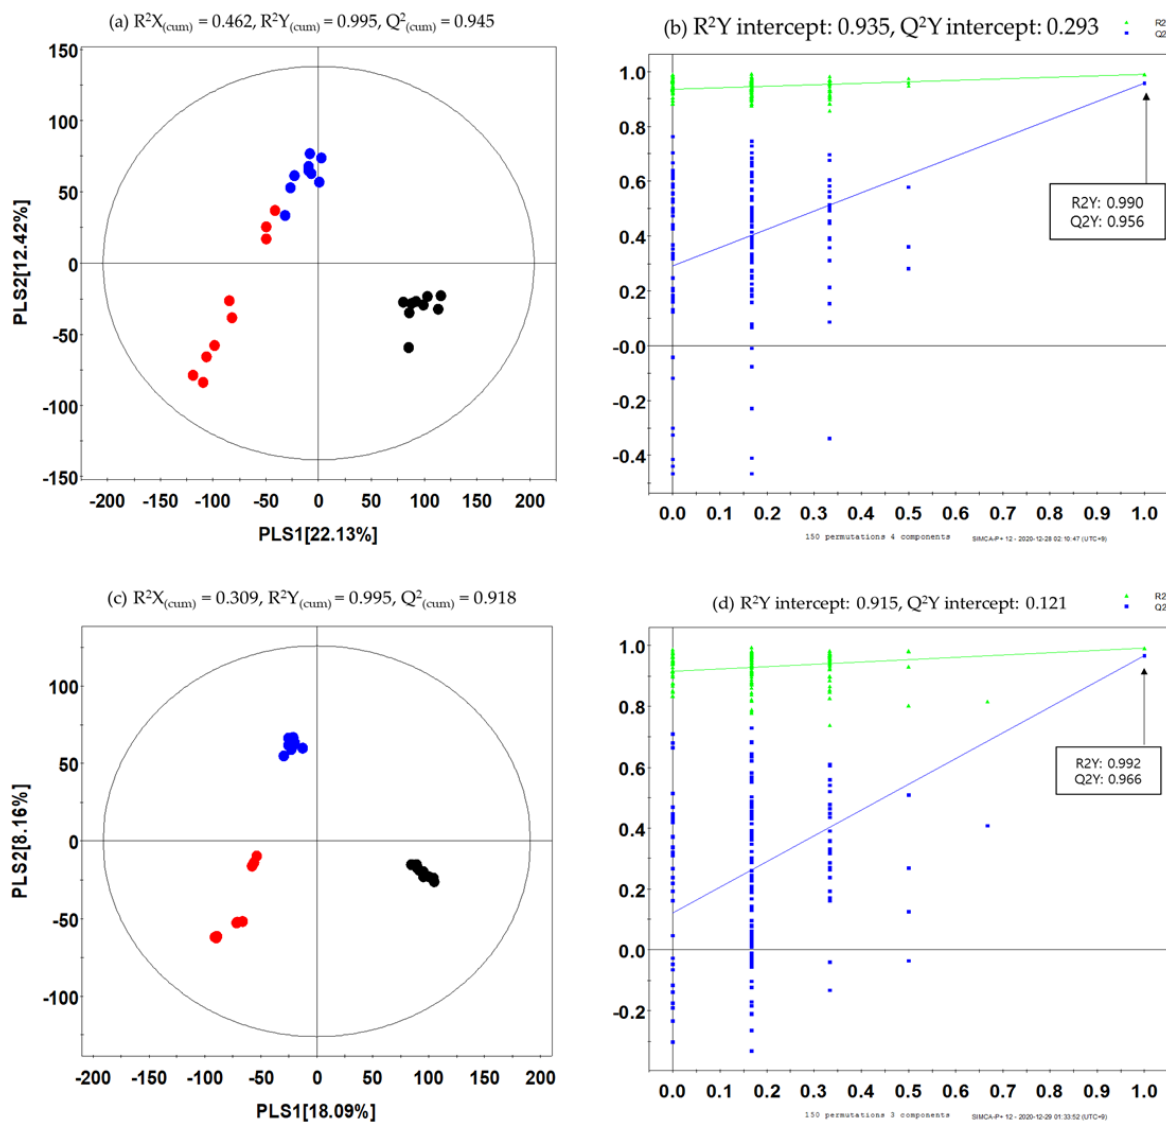

**Figure S3.** PLS-DA score plots and validation plots for GBP obtained after different UHP processing treatments. (a) PLS-DA score plots (GC-TOF-MS); (b) validation plot (GC-TOF-MS); (c) PLS-DA score plot (UHPLC-LTQ-Orbitrap-MS/MS); (d) validation plot (UHPLC-LTQ-Orbitrap-MS/MS). ●: Non-UHP-treated GBP (CON), ●: UHP-treated GBP at 500 MPa (U500), ●: UHP-treated GBP at 600 MPa (U600). The Y axis of validation plot represent  $R^2Y$  (green colored triangle) and  $Q^2Y$  (blue colored squared) for every model, and the X axis indicates the correlation coefficient between original and permuted response data. The Y intercepts of plot for the  $R^2Y$  and  $Q^2Y$  in each model were represented in number.

**Table S3.** Differential metabolites in the GBP obtained after different UHP processing treatments and GC-TOF-MS analyses

| RT (min)                       | Metabolites <sup>a</sup> | Mass | MS fragments <sup>b</sup>        | TMS | Ref. <sup>c</sup> | VIP1 | VIP2 |
|--------------------------------|--------------------------|------|----------------------------------|-----|-------------------|------|------|
| <i>Amino acids</i>             |                          |      |                                  |     |                   |      |      |
| 5.46                           | Alanine                  | 116  | 73, 86, 100, 116, 133, 147, 190  | 2   | Lib/STD           | 1.4  | 1.4  |
| 6.68                           | Valine                   | 144  | 73, 86, 100, 133, 144, 218       | 2   | Lib/STD           | 0.5  | 0.8  |
| 7.25                           | L-Leucine                | 158  | 73, 102, 116, 147, 158, 218, 232 | 2   | Lib/STD           | 0.3  | 1    |
| 7.46                           | L-Isoleucine             | 158  | 73, 100, 114, 147, 158, 218, 232 | 2   | Lib/STD           | 0.2  | 1.3  |
| 9.53                           | L-Proline                | 156  | 73, 100, 133, 147, 156, 230, 258 | 2   | Lib/STD           | 0.9  | 1.5  |
| 9.55                           | GABA                     | 174  | 73, 86, 147, 174, 216, 246, 304  | 3   | Lib/STD           | 1.4  | 1.9  |
| 10.36                          | Phenylalanine            | 218  | 73, 100, 147, 192, 218, 266      | 2   | Lib/STD           | 0.9  | 1.5  |
| 11.11                          | L-(-)-Fructose           | 160  | 73, 103, 117, 147, 160, 277      | 4   | Lib/STD           | 1.1  | 0.8  |
| 12.6                           | L-Tyrosine               | 218  | 73, 100, 179, 218, 280, 354      | 3   | Lib/MS            | 0.2  | 1.4  |
| 14.38                          | L-Tryptophan             | 202  | 73, 100, 130, 147, 202, 218, 291 | 3   | Lib/STD           | 0.7  | 1.5  |
| <i>Organic acid</i>            |                          |      |                                  |     |                   |      |      |
| 5.04                           | Lactic acid              | 219  | 73, 101, 117, 133, 147, 191, 219 | 2   | Lib/STD           | 2    | 1.6  |
| 6.55                           | Malonic acid             | 147  | 73, 99, 117, 133, 147, 233       | 2   | Lib/STD           | 1.9  | 1.7  |
| 7.62                           | Succinic acid            | 247  | 73, 86, 129, 147, 172, 218, 247  | 2   | Lib/STD           | 1.5  | 1.5  |
| 11.78                          | Citric acid              | 273  | 73, 133, 147, 183, 211, 257, 273 | 4   | Lib/STD           | 2    | 1.5  |
| 12.12                          | Quinic acid              | 255  | 73, 133, 147, 239, 255, 283      | 5   | Lib/STD           | 1.1  | 0.8  |
| <i>Sugar and sugar alcohol</i> |                          |      |                                  |     |                   |      |      |
| 10.67                          | D-(+)-Xylose             | 217  | 73, 103, 147, 189, 205, 217, 307 | 4   | Lib/STD           | 0.7  | 1.4  |
| 10.93                          | Xylitol                  | 217  | 73, 103, 129, 147, 157, 189, 217 | 5   | Lib/STD           | 1.3  | 1    |
| 11.23                          | D-(+)-Ribono-1,4-lactone | 246  | 73, 117, 133, 147, 204, 217, 259 | 3   | Lib/MS            | 0.2  | 1.1  |
| 12.21                          | D-Psicose                | 217  | 73, 103, 147, 189, 217, 277, 307 | 5   | Lib/MS            | 1    | 0.9  |
| 12.22                          | D-(-)-Fructose           | 307  | 73, 103, 147, 189, 217, 307, 364 | 5   | Lib/STD           | 1    | 0.9  |
| 12.37                          | D-Galactose              | 409  | 73, 160, 205, 229, 319           | 5   | Lib/STD           | 1    | 1.1  |
| 12.55                          | D-Glucose                | 160  | 73, 103, 129, 147, 160, 205, 319 | 5   | Lib/STD           | 1.7  | 1.5  |
| 12.62                          | D-Sorbitol               | 319  | 73, 103, 117, 147, 205, 217, 319 | 6   | Lib/STD           | 2.1  | 1.7  |
| 13.23                          | D-Glucopyranose          | 204  | 73, 103, 129, 147, 204, 217      | 5   | Lib/STD           | 2.1  | 1.6  |
| 13.65                          | Myo-Inositol             | 217  | 73, 129, 147, 191, 217, 265, 318 | 6   | Lib/STD           | 1.8  | 1.6  |
| 17.07                          | D-Maltose monohydrate    | 361  | 73, 149, 169, 204, 217, 243, 271 | 8   | Lib/STD           | 1    | 1    |
| 17.25                          | D-(+)-Turannose          | 361  | 73, 103, 147, 169, 191, 217, 319 | 8   | Lib/MS            | 1.9  | 1.7  |
| <i>Fatty acids</i>             |                          |      |                                  |     |                   |      |      |
| 10.31                          | 4-Hydroxybenzoic acid    | 223  | 73, 126, 179, 193, 223, 267, 282 | 2   | Lib/STD           | 1.2  | 1    |
| 13.17                          | Palmitic acid            | 313  | 73, 117, 145, 159, 201, 269, 313 | 1   | Lib/STD           | 1.6  | 1.3  |
| 14.2                           | Linoleic acid            | 337  | 75, 95, 109, 129, 150, 262, 337  | 1   | Lib/STD           | 1.2  | 1.1  |
| 14.35                          | Stearic acid             | 337  | 75, 117, 129, 145, 185, 201, 341 | 1   | Lib/STD           | 1.3  | 1.1  |
| 15.34                          | Oleamide                 | 337  | 75, 91, 116, 131, 198, 226, 338  | 1   | Lib/STD           | 0.9  | 1    |
| <i>Others</i>                  |                          |      |                                  |     |                   |      |      |
| 4.78                           | 2-Methyl-1,3-Propanediol | 117  | 73, 87, 101, 117, 133, 147, 219  | 2   | Lib/MS            | 1.5  | 1.3  |
| 4.92                           | 1-3-Propanediol          | 130  | 73, 103, 115, 130, 147, 177, 205 | 2   | Lib/MS            | 1.3  | 1    |
| 7.26                           | Glycerol                 | 205  | 73, 103, 117, 133, 147, 205, 218 | 3   | Lib/STD           | 1.3  | 1.7  |

<sup>a</sup> Metabolites identified based on variable importance projection (VIP) analysis results (with a cut-off value of 0.7) and  $p < 0.05$ . <sup>b</sup> MS fragmentation is the fragmentation of the tentative compound. <sup>c</sup> The MS spectrum was consistent with those of NIST and in-house libraries. The standard compound (STD) mass spectrum was similar to that of the standard compounds. Retention time, RT; trimethylsilyl, TMS.

**Table S4.** Differential metabolites in the GBP obtained after different UHP processing treatments and UHPLC-LTQ-Orbitrap-MS analyses

| Tentative metabolites <sup>a</sup> | RT (min) <sup>b</sup> | [M-H] <sup>-</sup>    | [M+H] <sup>+</sup>     | M.W. <sup>c</sup> | Molecular Formula | Delta ppm | MS/MS Fragments     | Ref. <sup>d</sup>  |
|------------------------------------|-----------------------|-----------------------|------------------------|-------------------|-------------------|-----------|---------------------|--------------------|
| Gentisic acid                      | 1.86                  | 153.0565              | 155.0703               | 154               | C8H10O3           | 4.9       | 153>134, 109        | [1]                |
| Chlorogenic acid                   | 3.83                  | 353.089               | 355.1021               | 354               | C16H18O9          | 3.3       | 191>179>135         | [2]                |
| Caffeic acid                       | 4.01                  | 179.0355              | 181.0494               | 180               | C9H8O4            | 4.3       | 179>135             | [3]                |
| Quercetin                          | 4.93                  | 301.0364              | 303.05                 | 302               | C15H10O7          | 3.4       | 301>273>245         | [4]                |
| Kaempferol-glucoside               | 5.08                  | 447.0945              | 449.1072               | 448               | C21H20O11         | 2.8       | 447>284>255         | [4]                |
| Syringaresinol                     | 5.11                  | 417.1574              | 431.1122 <sup>f</sup>  | 418               | C22H26O8          | 4.7       | 417>371>327>167     | webDB <sup>e</sup> |
| Notoginsenoside R1                 | 5.28                  | 977.5337 <sup>g</sup> | 955.5242 <sup>f</sup>  | 932               | C47H80O18         | 3.5       | 977>931>799,637,475 | [5]                |
| Ginsenoside Re                     | 5.48                  | 945.5388              | 969.5378 <sup>f</sup>  | 946               | C48H82O18         | -4.3      | 945>637>475         | [5]                |
| Ginsenoside Rg1                    | 5.49                  | 845.4898 <sup>g</sup> | 801.4979               | 800               | C42H72O14         | -0.7      | 845>799>637>475>391 | [5]                |
| Malonyl-Ginsenoside Re             | 5.67                  | 1031.5425             | 1055.5389 <sup>f</sup> | 1032              | C51H84O21         | -1.4      | 1031>987>945, 927   | [6]                |
| Malonyl-ginsenoside Rb1            | 6.31                  | 1193.5944             | 1195.6102              | 1194              | C57H94O26         | -1.4      | 1193>1149>1107      | [7]                |
| Notoginsenoside R2                 | 6.4                   | 769.476               | 793.4691 <sup>f</sup>  | 770               | C41H70O13         | 2.1       | 815>769>637>475     | [7]                |
| Ginsenoside Rc/Rb2                 | 6.45                  | 1077.584              | 1101.5801 <sup>f</sup> | 1078              | C53H90O22         | 1.1       | 1077>945>783, 621   | [5]                |
| Ginsenoside Rg2                    | 6.54                  | 829.4957 <sup>g</sup> | 807.4864 <sup>f</sup>  | 784               | C42H72O13         | 0.3       | 829>783>647, 475    | [5]                |
| Kaempferol                         | 6.55                  | 285.041               | 287.0544               | 286               | C15H10O6          | 2.1       | 285>257, 150>107    | [4]                |
| Ginsenoside Rd                     | 6.69                  | 991.5488 <sup>g</sup> | 1015.548 <sup>f</sup>  | 946               | C48H82O18         | 0.5       | 991>945>783, 621    | [5]                |
| Malonyl-Ginsenoside Rd             | 6.77                  | 1031.5422             | 1033.5605              | 1032              | C51H84O21         | -1        | 1031>987>945        | [5]                |
| Ginsenoside Rh1                    | 6.8                   | 683.4388 <sup>g</sup> | 661.4272 <sup>f</sup>  | 638               | C36H62O9          | 1.8       | 683>637>475         | [5]                |
| Compound Mx1/O                     | 7.06                  | 961.5392 <sup>g</sup> | 917.5463               | 916               | C47H80O17         | 1.6       | 961>915>753, 621    | STD <sup>e</sup>   |
| Ginsenoside F4                     | 7.4                   | 765.4784              | 767.4924               | 766               | C42H70O12         | -1.4      | 765>617>457         | [7,8]              |
| Compound K                         | 8.67                  | 667.4442 <sup>g</sup> | 645.4318 <sup>f</sup>  | 622               | C36H62O8          | 2.3       | 667>621>459         | [7]                |
| Ginsenoside Rh2                    | 8.85                  | 667.4442 <sup>g</sup> | 645.4347 <sup>f</sup>  | 622               | C36H62O8          | -0.6      | 667>621, 369        | [7]                |
| Ginsenoside Rk2/Rh3                | 9.79                  | 649.4328 <sup>g</sup> | 627.421 <sup>f</sup>   | 604               | C36H60O7          | 1.1       | 649>603>585, 445    | [8]                |

<sup>a</sup> The different metabolites were identified from the variable important in projection (VIP) analysis with a cut-off value of 0.7 and *p*-value < 0.05. <sup>b</sup> Retention time. <sup>c</sup> Molecular weight. <sup>d</sup> References. <sup>e</sup> Standard of ginsenoside. <sup>f</sup> [M+Na]<sup>+</sup>. <sup>g</sup> [M+FA-H]<sup>-</sup>



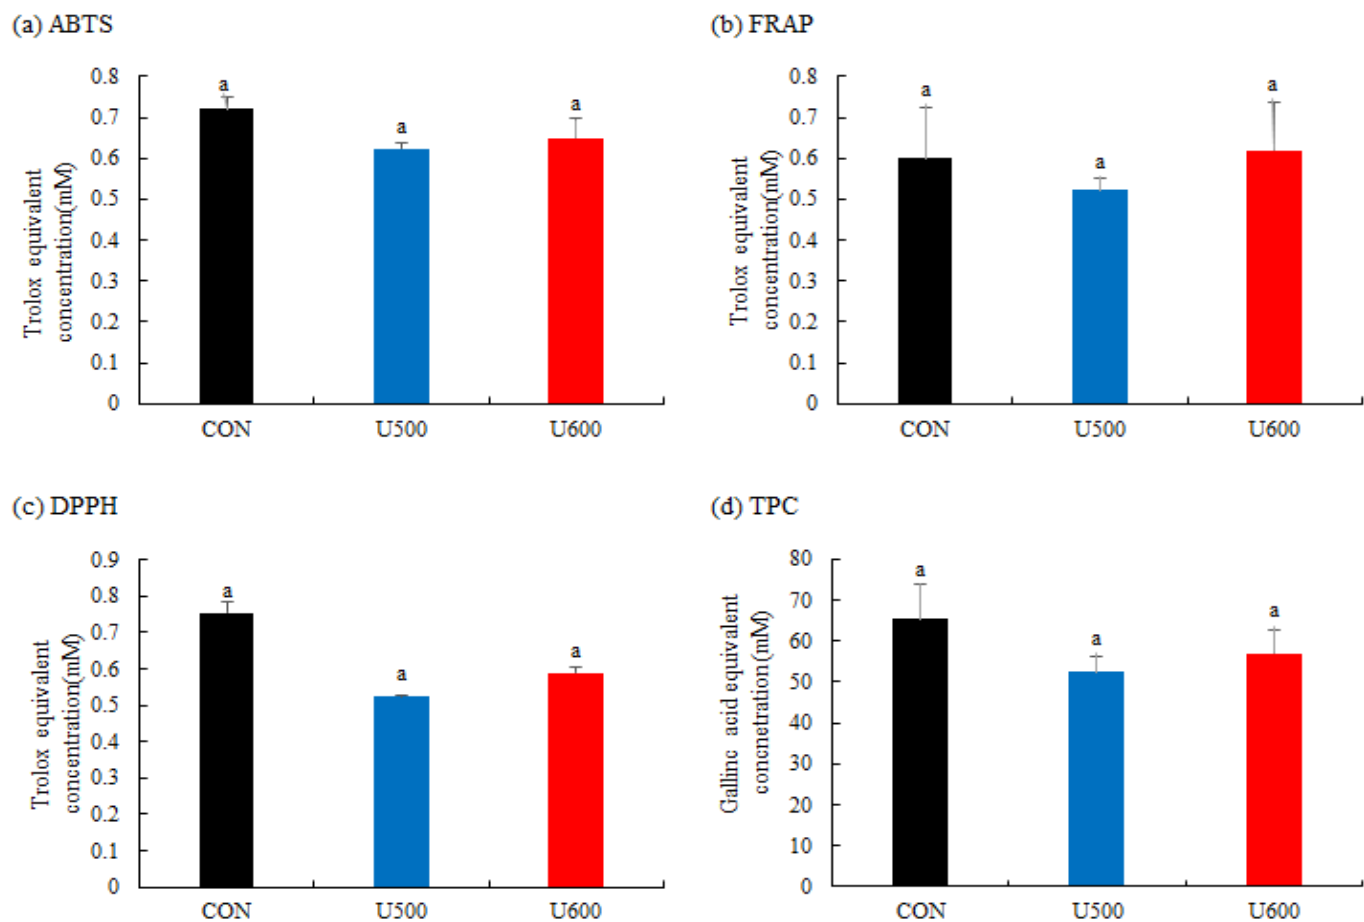

**Figure S4.** Antioxidant activity assay (a) ABTS; (b) FRAP; (c) DPPH; and (d) total phenolic contents (TPC) of GBP obtained after different UHP processing treatments. Values are expressed as the average of three biological replicates. Results shown in the bar graphs denoted by the same letter indicate absence of statistical difference, according to Duncan's multiple range test ( $p < 0.05$ ).

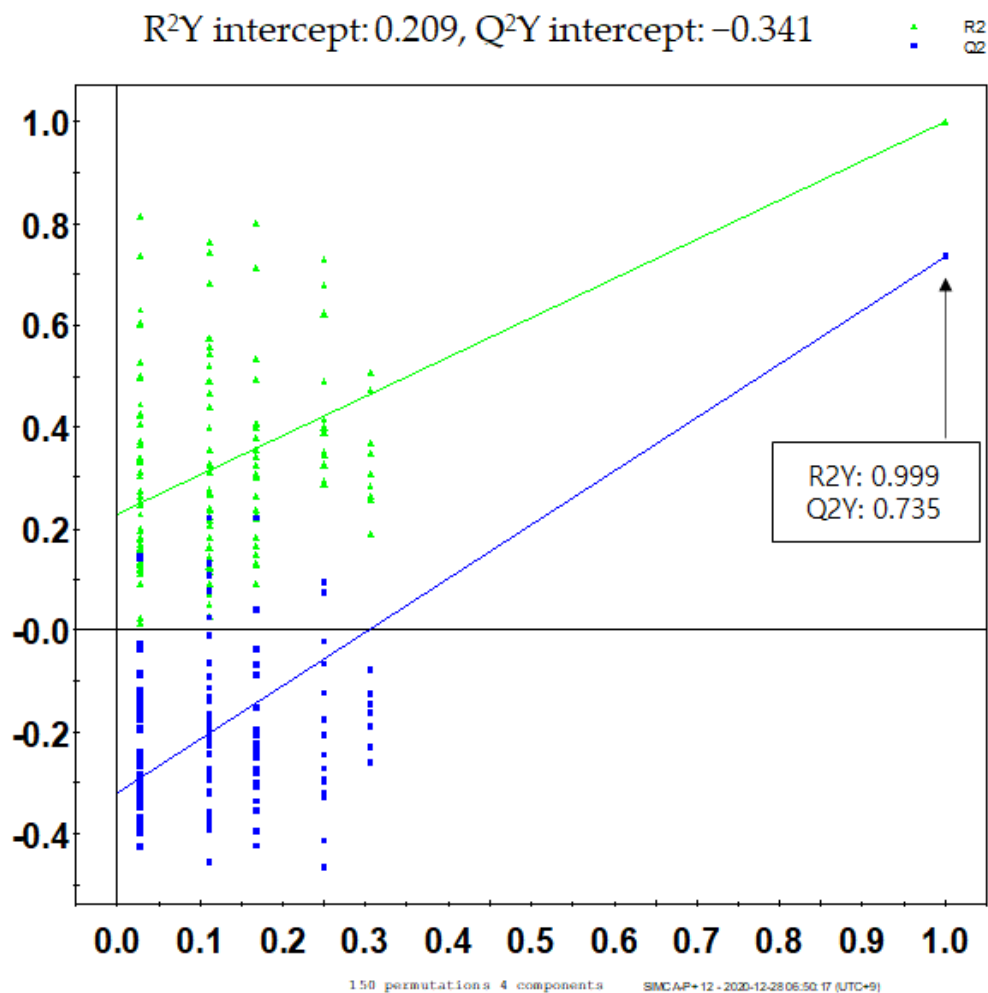

**Figure S5.** Validation plots of different solvent fractions of GBP analyzed by UHPLC-LTQ-Orbitrap-MS/MS. The Y axis of validation plot represent R<sup>2</sup>Y (green colored triangle) and Q<sup>2</sup>Y (blue colored squared) for every model, and the X axis indicates the correlation coefficient between original and permuted response data. The Y intercepts of plot for the R<sup>2</sup>Y and Q<sup>2</sup>Y in each model were represented in number.

**Table S5.** Differential metabolites in different solvent fractions of the GBP obtained after UHPLC-LTQ-Orbitrap-MS/MS analyses

| Classification                   | Tentative metabolites <sup>a</sup> | RT (min) <sup>b</sup> | [M-H] <sup>-</sup>    | [M+H] <sup>+</sup>    | MW <sup>c</sup> | Molecular formula | Delta ppm            | Fragment pattern                  | Ref. <sup>d</sup> |
|----------------------------------|------------------------------------|-----------------------|-----------------------|-----------------------|-----------------|-------------------|----------------------|-----------------------------------|-------------------|
| Phenolic acids                   | Quinic acid                        | 0.86                  | 191.0569              | 193.0636              | 192             | C7H12O6           | 2.1                  | 191>85>57                         | [3]               |
|                                  | Gentisic acid                      | 1.84                  | 153.0195              | 155.0341              | 154             | C7H6O4            | 0.4                  | 153>109                           | [1]               |
|                                  | Protocatechualdehyde               | 3.07                  | 137.0245              | 139.0393              | 138             | C7H6O3            | 0.7                  | 137>92                            | [9]               |
|                                  | Chlorogenic acid                   | 3.85                  | 353.0883              | 377.0848 <sup>f</sup> | 354             | C16H18O9          | -0.1                 | 353>191>127>99                    | [2]               |
|                                  | Caffeic acid                       | 4.02                  | 179.0351              | 181.0497              | 180             | C9H8O4            | 0.4                  | 179>135>107, 91                   | [5]               |
|                                  | 4-p-Coumaroylquinic acid           | 4.55                  | 337.0937              | 339.108               | 338             | C16H18O8          | 2                    | 337>191>127>85                    | [10]              |
|                                  | 5-Feruloylquinic acid              | 4.58                  | 367.1036              | 369.1182              | 368             | C17H20O9          | 0.7                  | 367>191>127>84                    | [11]              |
|                                  | p-Coumaric acid                    | 4.72                  | 163.0406              | 165.0548              | 164             | C9H7O3            | 3.2                  | 163>119                           | [12]              |
| Flavonoid                        | Quercetin                          | 4.93                  | 301.0359              | 303.0507              | 302             | C15H10O7          | 1.7                  | 301>273>245>150                   | [4]               |
|                                  | Kaempferol-glucoside               | 5.1                   | 447.0932              | 449.1082              | 448             | C21H20O11         | -0.1                 | 447>284>255                       | [4]               |
|                                  | Kaempferol                         | 6.5                   | 285.0402              | 287.0547              | 286             | C15H10O6          | -0.1                 | 285>197>167                       | [4]               |
| Lignan                           | 7-Hydroxysecoisolariciresinol      | 4.98                  | 377.1616              | 401.1572 <sup>f</sup> | 378             | C20H26O7          | 2.9                  | 377>347, 329>314                  | [13]              |
|                                  | Syringaresinol                     | 5.1                   | 417.1559              | 419.1711              | 418             | C22H26O8          | 1.1                  | 417>381>249                       | webDB             |
| Fatty acid                       | Trihydroxy-octadecenoic acid       | 6.6                   | 329.2325              | 353.2296 <sup>f</sup> | 330             | C18H34O5          | -0.5                 | 329>229>211>183                   | [10]              |
|                                  | Oxo-dihydroxy-octadecenoic acid    | 6.89                  | 327.2181              | 351.2143 <sup>f</sup> | 328             | C18H32O5          | 1.7                  | 327>309>291>273, 247              | [14]              |
| Ginsenoside                      | Ginsenoside Rb3                    | 5.27                  | 1123.592 <sup>g</sup> | 1101.582 <sup>f</sup> | 1078            | C53H90O22         | 0.9                  | 1123>1077>945>783, 637, 475       | [8]               |
|                                  | Notoginsenoside R1                 | 5.28                  | 977.5334 <sup>g</sup> | 955.5231 <sup>f</sup> | 932             | C47H80O18         | 0.4                  | 977>931>637>475                   | [5]               |
|                                  | Pseudoginsenoside F11              | 5.4                   | 799.4837              | 801.4995              | 800             | C42H72O14         | -1.6                 | 799>653>491>391                   | [5]               |
|                                  | Ginsenoside Re                     | 5.47                  | 991.5461 <sup>g</sup> | 969.5385 <sup>f</sup> | 946             | C48H82O18         | -1.8                 | 991>945>783, 637, 475             | [5]               |
|                                  | Ginsenoside Rg1                    | 5.51                  | 845.4900 <sup>g</sup> | 823.4814 <sup>f</sup> | 800             | C42H72O14         | -0.5                 | 845>799>491>391                   | [5]               |
|                                  | Malonylginsenoside Re              | 5.67                  | 1031.543              | 1055.54 <sup>f</sup>  | 1032            | C51H84O21         | -1.3                 | 1031>987>945, 799                 | [6]               |
|                                  | Ginsenoside Rf                     | 6.22                  | 845.4909 <sup>g</sup> | 801.4996              | 800             | C42H72O14         | 1                    | 845>799>653>491, 415              | [5]               |
|                                  | Malonyl-ginsenoside Rb1            | 6.31                  | 1193.595              | 1195.615              | 1194            | C57H94O26         | -2.1                 | 1193>1149>1107>945, 783, 621, 459 | [7]               |
|                                  | Notoginsenoside R2                 | 6.4                   | 815.4789 <sup>g</sup> | 793.4697 <sup>f</sup> | 770             | C41H70O13         | -0.2                 | 815>769>637, 475                  | [7]               |
|                                  | Ginsenoside Rb2/Rc                 | 6.45                  | 1077.581              | 1101.58 <sup>f</sup>  | 1078            | C53H90O22         | -2.2                 | 1077>945>783, 621                 | [5]               |
|                                  | Ginsenoside Rg2                    | 6.51                  | 829.4942 <sup>g</sup> | 807.4861 <sup>f</sup> | 784             | C42H72O13         | -1.5                 | 829>784>475>391                   | [5]               |
|                                  | Ginsenoside Rd                     | 6.68                  | 991.5474 <sup>g</sup> | 969.5388 <sup>f</sup> | 946             | C48H82O18         | -1.8                 | 991>945>783, 621                  | [5]               |
|                                  | Malonyl-ginsenoside Rd             | 6.74                  | 1031.542              | 1055.539 <sup>f</sup> | 1032            | C51H84O21         | -1.2                 | 1031>987>945>783, 621, 459        | [5]               |
|                                  | Ginsenoside Rh1                    | 6.76                  | 683.437 <sup>g</sup>  | 661.4277 <sup>f</sup> | 638             | C36H62O9          | -2.4                 | 683>637>475>391                   | [5]               |
|                                  | Compound Mc1/Mx1/O                 | 7.05                  | 961.5362 <sup>g</sup> | 939.5281 <sup>f</sup> | 916             | C47H80O17         | -2.1                 | 961>915>621>459                   | STD <sup>e</sup>  |
|                                  | Ginsenoside F1                     | 7.27                  | 683.438 <sup>g</sup>  | 661.4296 <sup>f</sup> | 638             | C36H62O9          | 0.3                  | 683>637>475                       | [5]               |
|                                  | Ginsenoside Rg4                    | 7.39                  | 811.4847 <sup>g</sup> | 789.4777 <sup>f</sup> | 766             | C42H70O12         | -0.2                 | 811>765>619                       | STD <sup>e</sup>  |
|                                  | Ginsenoside F4                     | 7.4                   | 765.4782              | 789.4772 <sup>f</sup> | 766             | C42H70O12         | -1.9                 | 765>619>527                       | [8]               |
|                                  | Ginsenoside F2                     | 7.4                   | 829.4942 <sup>g</sup> | 807.4872 <sup>f</sup> | 784             | C42H72O13         | -2                   | 829>783>621>537                   | STD <sup>e</sup>  |
|                                  | Ginsenoside Rh4                    | 7.62                  | 665.4261 <sup>g</sup> | 643.4181 <sup>f</sup> | 620             | C36H60O8          | 0                    | 665>619>561>471, 353              | STD <sup>e</sup>  |
| Ginsenoside LXXV/Ginsenoside Rg3 | 7.75                               | 829.4948              | 853.4958 <sup>f</sup> | 830                   | C42H72O13       | 0                 | 829>783>621>537, 459 | [8]                               |                   |
| Protopanaxatriol-20              | 8.47                               | 521.3846 <sup>g</sup> | 499.3747 <sup>f</sup> | 476                   | C30H52O4        | -0.2              | 521>475>391>373, 355 | [8]                               |                   |
| Ginsenoside Rg5                  | 8.56                               | 765.4781              | 789.477 <sup>f</sup>  | 766                   | C42H70O12       | -1.7              | 765>603>441          | [8]                               |                   |
| Ginsenoside Rh2                  | 8.84                               | 667.4418 <sup>g</sup> | 623.451               | 622                   | C36H62O8        | -1.4              | 667>621>459>375      | [8]                               |                   |
| Ginsenoside Rk2/Rh3              | 9.76                               | 649.4312 <sup>g</sup> | 605.4417              | 604                   | C36H60O7        | -0.2              | 649>603>457>373      | [8]                               |                   |

<sup>a</sup> Different metabolites were identified from the variable important in projection (VIP) analysis with a cut-off value of 0.7 and *p*-value < 0.05. <sup>b</sup> Retention time. <sup>c</sup> Molecular weight. <sup>d</sup> References. <sup>e</sup> Standard of ginsenoside. <sup>f</sup> [M+Na]<sup>+</sup>. <sup>g</sup> [M+FA-H].

## Supplementary references

1. Wang, L.; Halquist, M.S.; Sweet, D.H. Simultaneous determination of gallic acid and gentisic acid in organic anion transporter expressing cells by liquid chromatography-tandem mass spectrometry. *Journal of Chromatography B* **2013**, *937*, 91-96.
2. Jaiswal, R.; Müller, H.; Müller, A.; Karar, M.G.E.; Kuhnert, N. Identification and characterization of chlorogenic acids, chlorogenic acid glycosides and flavonoids from *Lonicera henryi* L.(Caprifoliaceae) leaves by LC-MS<sup>n</sup>. *Phytochemistry* **2014**, *108*, 252-263.
3. Mata, A.; Ferreira, J.; Semedo, C.; Serra, T.; Duarte, C.; Bronze, M. Contribution to the characterization of *Opuntia* spp. juices by LC-DAD-ESI-MS/MS. *Food Chemistry* **2016**, *210*, 558-565.
4. Suh, D.H.; Jung, E.S.; Lee, G.M.; Lee, C.H. Distinguishing six edible berries based on metabolic pathway and bioactivity correlations by non-targeted metabolite profiling. *Frontiers in Plant Science* **2018**, *9*, 1462.
5. Mao, Q.; Bai, M.; Xu, J.-D.; Kong, M.; Zhu, L.-Y.; Zhu, H.; Wang, Q.; Li, S.-L. Discrimination of leaves of *Panax ginseng* and *P. quinquefolius* by ultra high performance liquid chromatography quadrupole/time-of-flight mass spectrometry based metabolomics approach. *Journal of Pharmaceutical and Biomedical Analysis* **2014**, *97*, 129-140.
6. Lee, M.Y.; Seo, H.S.; Singh, D.; Lee, S.J.; Lee, C.H. Unraveling dynamic metabolomes underlying different maturation stages of berries harvested from *Panax ginseng*. *Journal of ginseng research* **2020**, *44*, 413-423.
7. Lee, J.W.; Choi, B.-R.; Kim, Y.-C.; Choi, D.J.; Lee, Y.-S.; Kim, G.-S.; Baek, N.-I.; Kim, S.-Y.; Lee, D.Y. Comprehensive profiling and quantification of ginsenosides in the root, stem, leaf, and berry of *Panax ginseng* by UPLC-QTOF/MS. *Molecules* **2017**, *22*, 2147.
8. Wu, W.; Sun, L.; Zhang, Z.; Guo, Y.; Liu, S. Profiling and multivariate statistical analysis of *Panax ginseng* based on ultra-high-performance liquid chromatography coupled with quadrupole-time-of-flight mass spectrometry. *Journal of pharmaceutical and biomedical analysis* **2015**, *107*, 141-150.
9. Zeng, G.; Xiao, H.; Liu, J.; Liang, X. Identification of phenolic constituents in *Radix Salvia miltiorrhizae* by liquid chromatography/electrospray ionization mass spectrometry. *Rapid Communications in Mass Spectrometry* **2006**, *20*, 499-506.
10. Zengin, G.; Llorent-Martínez, E.; Sinan, K.I.; Yildiztugay, E.; Picot-Allain, C.; Mahomoodally, M.F. Chemical profiling of *Centaurea bornmuelleri* Hausskn. aerial parts by HPLC-MS/MS and their pharmaceutical effects: From nature to novel perspectives. *Journal of pharmaceutical and biomedical analysis* **2019**, *174*, 406-413.
11. Keser, D.; Guclu, G.; Kelebek, H.; Keskin, M.; Soysal, Y.; Sekerli, Y.E.; Arslan, A.; Selli, S. Characterization of aroma and phenolic composition of carrot (*Daucus carota* 'Nantes') powders obtained from intermittent microwave drying using GC-MS and LC-MS/MS. *Food and Bioproducts Processing* **2020**, *119*, 350-359.
12. Jaitz, L.; Siegl, K.; Eder, R.; Rak, G.; Abranko, L.; Koellensperger, G.; Hann, S. LC-MS/MS analysis of phenols for classification of red wine according to geographic origin, grape variety and vintage. *Food Chemistry* **2010**, *122*, 366-372.
13. Eklund, P.C.; Backman, M.J.; Kronberg, L.; Smeds, A.I.; Sjöholm, R.E. Identification of lignans by liquid chromatography-electrospray ionization ion-trap mass spectrometry. *Journal of mass spectrometry* **2008**, *43*, 97-107.
14. Islam, A.K.M.M.; Hong, S.-M.; Lee, H.-S.; Moon, B.-C.; Kim, D.; Kwon, H. Identification and characterization of matrix components in spinach during QuEChERS sample preparation for pesticide residue analysis by LC-ESI-MS/MS, GC-MS and UPLC-DAD. *Journal of food science and technology* **2018**, *55*, 3930-3938.
